# Supplementary material for: Human-Induced Pluripotent Stem Cell-Derived Neural Progenitor Cells Showed Neuronal Differentiation, Neurite Extension, and Formation of Synaptic Structures in Rodent Ischemic Stroke Brains
Source: MDPI journal article supplement (doi:10.3390/cells13080671), 2024-04-12
Supplement: s1 [file s1]

**Supplementary Table S2: List of primary antibodies used**

| Antigen           |                                             | Host Species, Clonality | Clone        | MPN         | Supplier                 | Application  |
|-------------------|---------------------------------------------|-------------------------|--------------|-------------|--------------------------|--------------|
| PSA-NCAM          | Polysialic acid-NCAM                        | M, mono                 | 2-2B         | MAB5324     | Merck                    | FCM          |
| GD2               | Ganglioside GD2                             | M, mono                 | 14.G2a       | 554272      | BD                       | FCM          |
| SOX1              | SRY-Related HMG-Box Gene 1                  | M, mono                 | N23-844      | 561592      | BD                       | FCM          |
| SOX1              | SRY-Related HMG-Box Gene 1                  | M, mono                 | N23-844      | 560749      | BD                       | ICC          |
| SOX1              | SRY-Related HMG-Box Gene 1                  | G, poly                 | -            | AF3369      | R&D                      | IHC-F        |
| TRA1-60           | -                                           | M, mono                 | TRA1-60      | 560071      | BD                       | FCM          |
| TRA1-60           | -                                           | M, mono                 | TRA1-60      | 560173      | BD                       | FCM          |
| SSEA3             | Stage specific embryonic antigen 3          | R, mono                 | MC-631       | MAB4303-I   | Merck                    | FCM          |
| SSEA4             | Stage specific embryonic antigen 4          | M, mono                 | MC813-70     | 560126      | BD                       | FCM          |
| OCT3/4            | Octamer-binding transcription factor 3/4    | M, mono                 | 40/Oct-3     | 560186      | BD                       | FCM          |
| OCT3/4            | Octamer-binding transcription factor 3/4    | M, mono                 | 40/Oct-3     | 611203      | BD                       | ICC          |
| NES               | Nestin                                      | M, mono                 | 10C2         | MAB5326     | Merck                    | ICC          |
| βIII-tubulin      | Class III β-tubulin                         | M, mono                 | TUJ1         | 801201      | BioLegend                | ICC          |
| GFAP              | Glial fibrillary acidic protein             | Rb, mono                | EP672Y       | ab33922     | Abcam                    | ICC          |
| NeuN              | Neuron-Specific Nuclear Protein             | Rb, mono                | EPR12763     | ab177487    | Abcam                    | IHC-F        |
| NeuN              | Neuron-Specific Nuclear Protein             | M, mono                 | A60          | MAB377      | Merck                    | IHC-C        |
| HNA               | Human nuclear antigen                       | M, mono                 | 3E1.3        | MAB4383     | Merck                    | IHC-C, IHC-F |
| Ki-67             | -                                           | M, mono                 | MIB-1        | M7240       | Agilent Technologies     | IHC-C        |
| ELAVL3/4 [HuC/D]  | Embryonic lethal abnormal vision-like 3/4   | Rb, mono                | EPR19098     | ab184267    | Abcam                    | IHC-F        |
| ELAVL3/4 [HuC/D]  | Embryonic lethal abnormal vision-like 3/4   | M, mono                 | 16A11        | A21271      | Thermo Fisher Scientific | ICC          |
| hSYN              | Human synaptophysin                         | M, mono                 | EP10         | ADI-905-782 | Enzo Life Sciences       | IHC-C, IHC-F |
| STEM121           | Human cytoplasmic marker                    | M, mono                 | STEM121      | Y40410      | Takara Bio               | IHC-C, IHC-F |
| STEM123           | Human Glial fibrillary acidic protein       | M, mono                 | STEM123      | Y40420      | Takara Bio               | IHC-F        |
| SOX10             | SRY-Related HMG-Box Gene 10                 | Rb, mono                | EPR4007-104  | ab180862    | Abcam                    | IHC-F        |
| DreA              | DrebrinA                                    | Rb, poly                | -            | 28023       | IBL                      | IHC-F        |
| vGLUT1            | Vesicular glutamate transporter 1           | Rb, poly                | -            | 135 303     | Synaptic systems         | IHC-F        |
| vGLUT2            | Vesicular glutamate transporter 2           | Rb, poly                | -            | 135 403     | Synaptic systems         | IHC-F        |
| ChAT              | Choline acetyltransferase                   | G, poly                 | -            | AB144P      | Merck                    | IHC-F        |
| GAD67             | Glutamate decarboxylase 67                  | M, mono                 | 1G10.2       | MAB5406     | Merck                    | IHC-F        |
| p-GAP43 (Thr 172) | Phosphorylated growth associated protein 43 | M, mono                 | 19-9A        | 017-25411   | Fujifilm Wako Chemical   | ICC, IHC-F   |
| HLA-ABC-Biotin    | Human leukocyte antigen-ABC                 | M, mono                 | EMR8-5       | AB-46-B     | Hokudo                   | IHC-F        |
| L1CAM             | L1 cell adhesion molecule                   | Rb, mono                | EPR23241-224 | ab270455    | Abcam                    | ICC          |

M, mouse; R, rat; Rb, rabbit; G, goat; mono, monoclonal; poly, polyclonal; FCM, flow cytometry; ICC, immunocytochemical analysis (in vitro); IHC-C, immunohistochemical analysis (chromogenic detection in vivo); IHC-F, immunohistochemical analysis (fluorescent detection in vivo)
