# Supplementary material for: Human-Induced Pluripotent Stem Cell-Derived Neural Progenitor Cells Showed Neuronal Differentiation, Neurite Extension, and Formation of Synaptic Structures in Rodent Ischemic Stroke Brains
Source: MDPI journal article supplement (doi:10.3390/cells13080671), 2024-04-12
Supplement: s1 [file s1]

**Supplementary Table S3: Neurological Deficit Score**

|                                                                                                                                                                    | Score  |
|--------------------------------------------------------------------------------------------------------------------------------------------------------------------|--------|
| <u>Forelimb flexion</u>                                                                                                                                            |        |
| Animals were held gently by the tail, suspended about 10 cm above the floor, and observed for forelimb flexion.                                                    |        |
| • animals extend both forelimbs toward the floor                                                                                                                   | 0      |
| • there is a slight difference between forelimb extension                                                                                                          | 1      |
| • there is about 90-degree flexion in the affected forelimb                                                                                                        | 2      |
| • impossible to move the affected forelimb                                                                                                                         | 3      |
| <u>Hindlimb flexion</u>                                                                                                                                            |        |
| The animal's head was covered with a hand, and under a sedative condition the hindlimbs were gently pulled toward the tail, and observed retractive power.         |        |
| • retractive power is not different between hindlimbs                                                                                                              | 0      |
| • retractive power of the right hindlimbs weaker than that of the left hindlimb                                                                                    | 1      |
| • the right hindlimb is extended abnormally, and is retractable when the sole is touched with a finger                                                             | 2      |
| • the right hindlimb is extended abnormally, and is not retractable when the sole is touched with a finger                                                         | 3      |
| <u>Rotational behavior</u>                                                                                                                                         |        |
| Animals were held gently by the tail, and with their forelimbs on the floor, and observed rotational behavior.                                                     |        |
| • animal walks ahead, and can walk to the right and left                                                                                                           | 0      |
| • animal usually walks ahead, and cannot walk towards the left                                                                                                     | 1      |
| • animal usually walks towards the right, and can walk ahead                                                                                                       | 2      |
| • animal walks towards the right, and cannot walk ahead                                                                                                            | 3      |
| <u>Lateral displacement</u>                                                                                                                                        |        |
| On stable condition, gentle lateral pressure was applied for the animal's body, and observed resistance to a lateral push.                                         |        |
| • animal resisted sliding equally in both directions                                                                                                               | 0      |
| • resistance to a lateral push towards the right is slightly reduced, but keep the posture                                                                         | 1      |
| • resistance to a lateral push towards the right is markedly reduced, and difficult to keep the hindlimb                                                           | 2      |
| • resistance to a lateral push towards the right is markedly reduced and the animal falls on its back                                                              | 3      |
| <u>General posture</u>                                                                                                                                             |        |
| The general posture of each animal was observed.                                                                                                                   |        |
| • animal's posture after the operation is not different from that in normal animals                                                                                | 0      |
| • when looking at animals from the back, the left forelimb and hindlimb can be seen, because balance has shifted to the right                                      | 1      |
| • when looking at animals from the back, the left forelimb and hindlimb can be seen, and when looking at animals from the front, their bodies are leaning slightly | 2      |
| • when looking at animals from the back, the left forelimb and hindlimb can be seen, and when looking at animals from the front, their bodies are leaning markedly | 3      |
| Total score                                                                                                                                                        | (0-15) |
