# Supplementary material for: Human-Induced Pluripotent Stem Cell-Derived Neural Progenitor Cells Showed Neuronal Differentiation, Neurite Extension, and Formation of Synaptic Structures in Rodent Ischemic Stroke Brains
Source: MDPI journal article supplement (doi:10.3390/cells13080671), 2024-04-12
Supplement: s1 [file s1]

**Supplementary Table S1: Primer Information**

| Official name                            | Symbol | Gene ID | MPN           | Supplier                 |
|------------------------------------------|--------|---------|---------------|--------------------------|
| POU class 5 homeobox 1                   | POU5F1 | 5460    | AIWR4JF       | Thermo Fisher Scientific |
| SRY-box transcription factor 1           | SOX1   | 6656    | Hs01057642_s1 | Thermo Fisher Scientific |
| SRY-box transcription factor 2           | SOX2   | 6657    | Hs00602736_s1 | Thermo Fisher Scientific |
| paired box 6                             | PAX6   | 5080    | Hs00240871_m1 | Thermo Fisher Scientific |
| nestin                                   | NES    | 10763   | Hs00707120_s1 | Thermo Fisher Scientific |
| glyceraldehyde-3-phosphate dehydrogenase | GAPDH  | 2597    | Hs99999905_m1 | Thermo Fisher Scientific |
